# Supplementary figures and images for: Probiotic modulation of symbiotic gut microbial–host metabolic interactions in a humanized microbiome mouse model
Source: PubMed Central journal article supplement — Mol Syst Biol. 2008 Jan 15;4:157. doi: 10.1038/msb4100190 (PMC2238715; doi:10.1038/msb4100190), 2008-01-15

(A) HBF

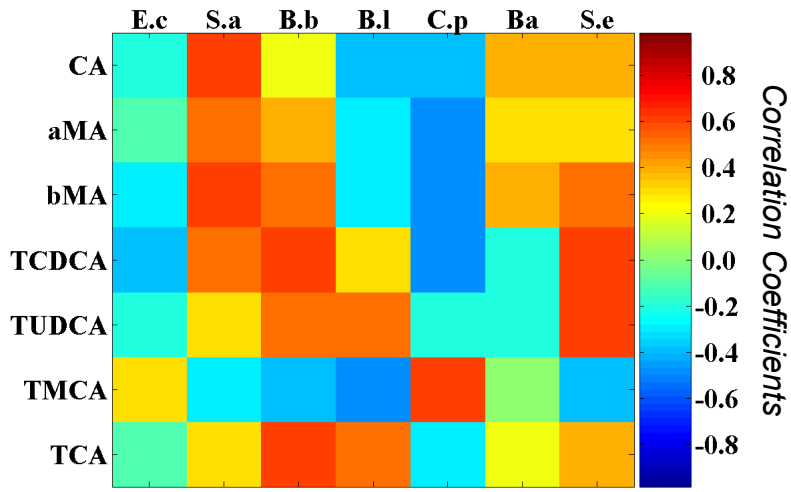

(B) HBF - *L. paracasei*

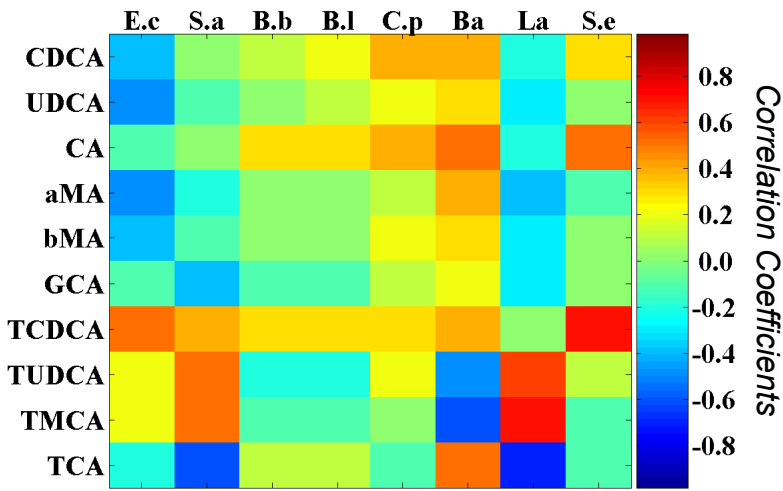

(C) HBF - *L. rhamnosus*

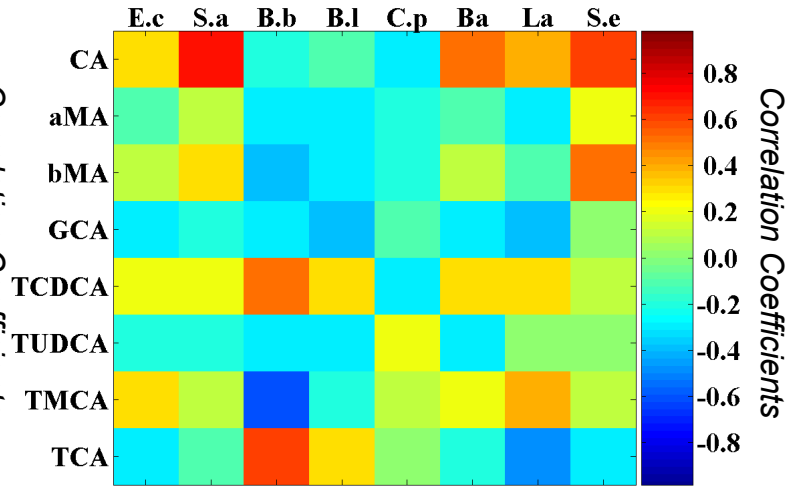

Supplement: msb4100190-s2.pdf [file msb4100190-s2.pdf]

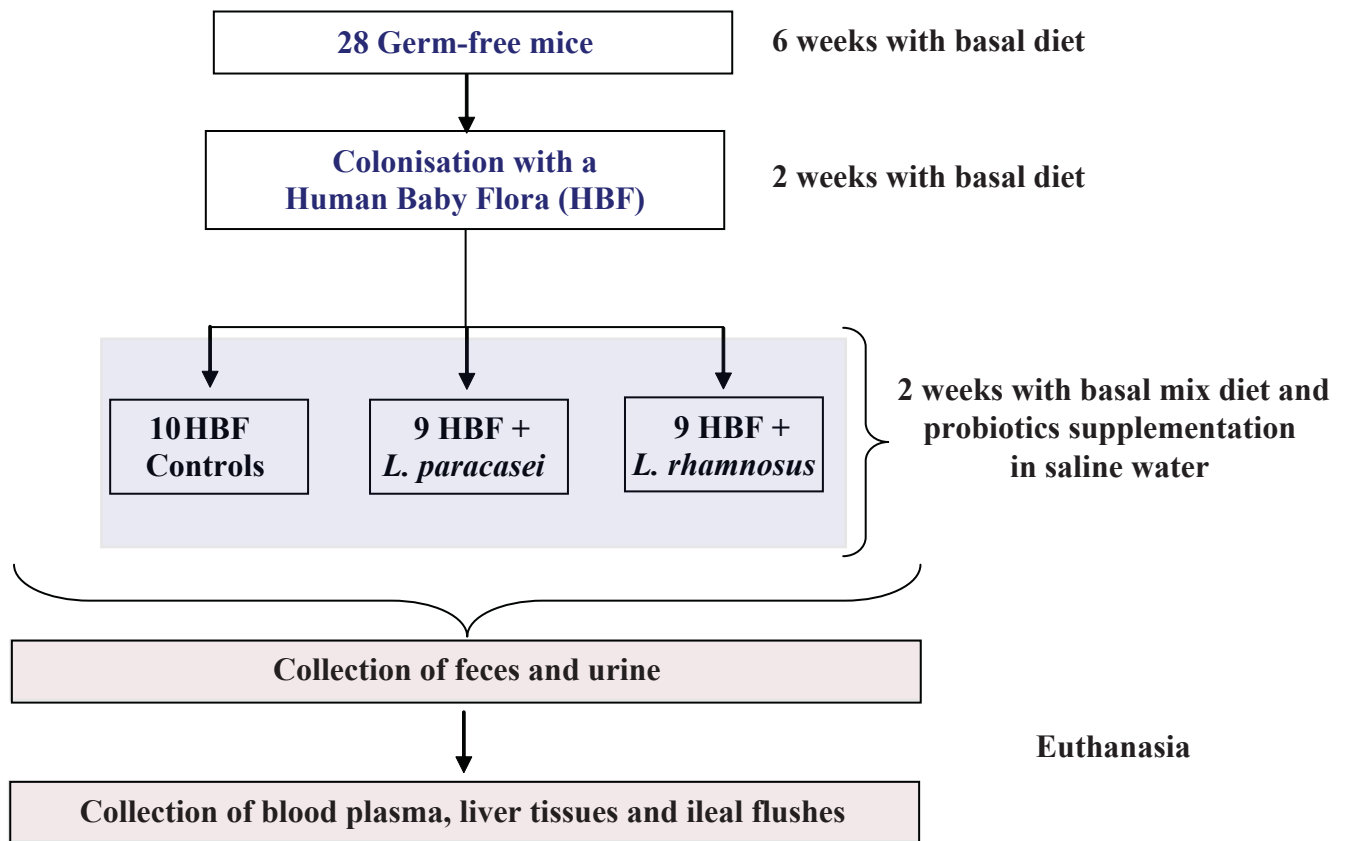

Supplement: msb4100190-s3.pdf [file msb4100190-s3.pdf]
